# Supplementary material for: pH-Responsive Succinoglycan-Carboxymethyl Cellulose Hydrogels with Highly Improved Mechanical Strength for Controlled Drug Delivery Systems
Source: MDPI journal article supplement (doi:10.3390/polym13183197), 2021-09-21
Supplement: s1 [file s1]

## Supplementary Materials

### Table of Contents

1. Energy-Dispersive Spectroscopy (EDS) Analysis..... p2
2. Summarizing the results obtained in this work with other previously published papers...p3

### 1. Energy-Dispersive Spectroscopy (EDS) Analysis

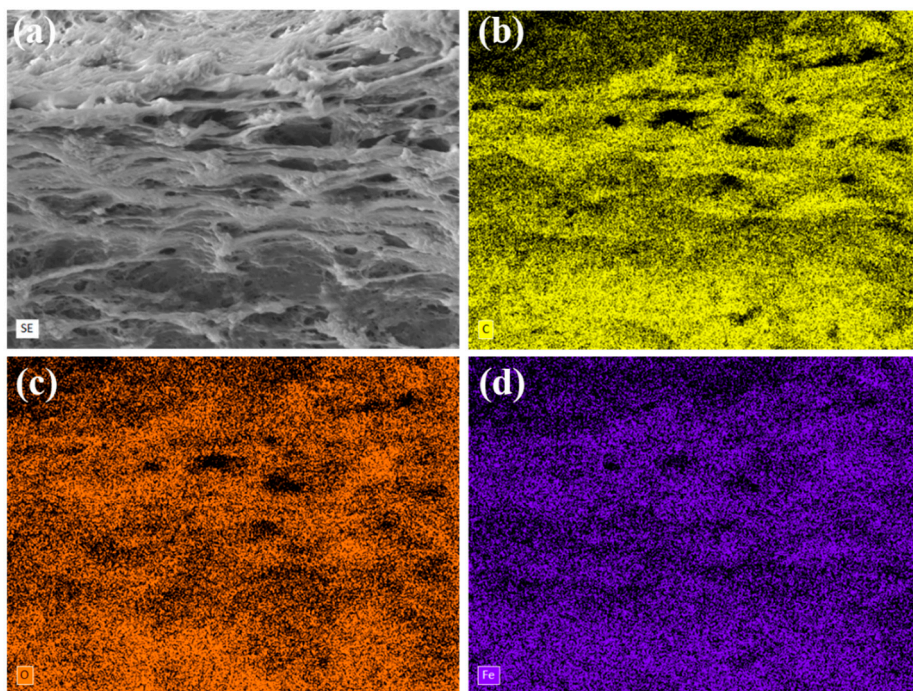

**Figure S1.** (a) SEM image of S1C1 gel, (b), (c) and (d) EDS mapping image for C, O and Fe

## 2. Summarizing the results obtained in this work with other previously published papers

|                                                                | Acrylic acid<br>/CMC                         | XG <sup>1</sup><br>/CMC                         | HA <sup>2</sup><br>/CMC                             | Alg <sup>3</sup><br>/CMC               | SG<br>/CMC                                 |
|----------------------------------------------------------------|----------------------------------------------|-------------------------------------------------|-----------------------------------------------------|----------------------------------------|--------------------------------------------|
| <b>Gel Characteristics</b>                                     | Non-bead form<br>Using synthetic<br>polymers | Bead form<br>Using modified<br>natural polymers | Non-bead form<br>Using modified<br>natural polymers | Bead form<br>Using natural<br>polymers | Non-bead form<br>Using natural<br>polymers |
| <b>Compressive test<br/>(Mechanical strength)</b>              | ○                                            | —                                               | ○                                                   | —                                      | ○                                          |
| <b>TGA<sup>4</sup>/DTG<sup>5</sup><br/>(Thermal stability)</b> | —                                            | ○                                               | ○                                                   | —                                      | ○                                          |
| <b>pH-dependent drug<br/>release</b>                           | —                                            | ○                                               | —                                                   | ○                                      | ○                                          |
| <b>Reference</b>                                               | [27]                                         | [32]                                            | [29]                                                | [30]                                   | —                                          |

1: Xanthan Gum    2: Hyaluronic acid    3: Alginate    4: Thermogravimetric analysis    5: Derivative thermogravimetry

**Table S1.** Summary of gel characteristics, compressive test, TGA/DTG, and pH-dependent drug release results obtained in this study with other previously published papers
